# Supplementary material for: Enhanced immunity: the gut microbiota changes in high-altitude Tibetan pigs compared to Yorkshire pigs
Source: Front Microbiol. 2024 Nov 18;15:1469253. doi: 10.3389/fmicb.2024.1469253 (PMC11609222; doi:10.3389/fmicb.2024.1469253)
Supplement: Supplementary file 1 [file Table_1.xlsx]

## Sheet: Metagenomic quality control
Sample ID	RawData	CleanData	Clean_Q20	Clean_Q30	Clean_GC(%)	Effective(%)
TP1	10882	10854.8	96.91	91.82	49.28	99.75
TP2	11112.2	11092.3	97.31	92.63	46.87	99.821
TP3	10713.2	10694	97.1	92.14	45.84	99.821
TP4	10574.5	10552.8	97.33	92.6	46.03	99.794
YY1	10745.3	10693.5	97.25	92.58	46.01	99.517
YY2	9858.81	9833.01	97.09	92.23	46.57	99.738
YY3	10076.3	10036.2	97.26	92.52	47.77	99.602
YY4	10754.3	10718.1	97.35	92.62	44.26	99.664
Average	10589.6	10559.3	97.2	92.3925	46.5787	99.7134

## Sheet: 16S quality control
Sample	sample-id	input	filtered	percentage of input passed filter	denoised	non-chimeric	percentage of input non-chimeric
ZZ1	TP1	66071	61469	93.03	59881	59099	89.45
ZZ2	TP2	67475	62878	93.19	61386	60826	90.15
ZZ3	TP3	67983	60587	89.12	59080	58644	86.26
ZZ5	TP4	54382	50203	92.32	46939	45726	84.08
ZZ6	TP5	71251	63872	89.64	62021	59951	84.14
ZZ7	TP6	70707	63434	89.71	61701	61171	86.51
YY1	YY1	67289	61562	91.49	60366	60014	89.19
YY10	YY2	73410	67193	91.53	66005	65690	89.48
YY11	YY3	72364	64586	89.25	63124	62762	86.73
YY14	YY4	68779	62713	91.18	61368	60969	88.64
YY19	YY5	58579	54808	93.56	53743	52035	88.83
YY5	YY6	71213	65535	92.03	64206	63879	89.7
	Average	67458.6	61570	91.3375	59985	59230.5	87.7633

## Sheet: Metagenomic assembly
SampleID	Total len.(bp)	Num.	Average len.(bp)	N50 Len.(bp)	N90 Len.(bp)	Max len.(bp)
TP1	606134862	537256	1128.2	1206	574	220002
TP2	526958357	449551	1172.19	1284	580	178125
TP3	443424172	383901	1155.05	1261	576	151441
TP4	469838860	373421	1258.2	1470	591	163714
YY1	545237297	503245	1083.44	1160	558	140906
YY2	465110283	410688	1132.51	1257	563	442947
YY3	541712747	465572	1163.54	1296	581	82183
YY4	458018348	345075	1327.3	1621	605	144866
Average	5.07054e+08	433589	1177.55	1319.38	578.5	190523
